# Supplementary material for: Effect of H2S pre-annealing treatment on interfacial and electrical properties of HfO2/Si1−xGex (x = 0–0.3)
Source: Royal Society of Chemistry journal article supplement (doi:10.1039/d0tc04760k), 2020-12-29
Supplement: d0tc04760k1.pdf [file d0tc04760k1.pdf]

## Supporting Information

### Effect of H<sub>2</sub>S pre-annealing treatment on interfacial and electrical properties of HfO<sub>2</sub>/Si<sub>1-x</sub>Ge<sub>x</sub> (x = 0–0.3)

*Woohui Lee,<sup>a</sup> Changmin Lee,<sup>a</sup> Jinyong Kim,<sup>a</sup> Jehoon Lee,<sup>a</sup> Deo joon Eom,<sup>a</sup> Jae Chan Park,<sup>b</sup>  
Tae Joo Park<sup>b</sup> and Hyounsub Kim<sup>\*,a</sup>*

<sup>a</sup> School of Advanced Materials Science & Engineering, Sungkyunkwan University, Suwon  
16419, Republic of Korea

<sup>b</sup> Department of Materials Science & Chemical Engineering, Hanyang University, Ansan  
15588, Republic of Korea

\*Corresponding Author: [hsubkim@skku.edu](mailto:hsubkim@skku.edu)

**Table S1.** Compositional analysis results calculated using XPS spectra in Figs. 5–7. Here, the carbon concentration was not included, and the units are at.%.

| Sample         | Si                             |                               | Si <sub>0.85</sub> Ge <sub>0.15</sub> |                               | Si <sub>0.7</sub> Ge <sub>0.3</sub> |                               |
|----------------|--------------------------------|-------------------------------|---------------------------------------|-------------------------------|-------------------------------------|-------------------------------|
|                | w/o H <sub>2</sub> S treatment | w/ H <sub>2</sub> S treatment | w/o H <sub>2</sub> S treatment        | w/ H <sub>2</sub> S treatment | w/o H <sub>2</sub> S treatment      | w/ H <sub>2</sub> S treatment |
| Si (substrate) | 100                            | 95.8                          | 82.8                                  | 76.2                          | 70.5                                | 59.4                          |
| Si (oxide)     | -                              | 3.2                           | -                                     | 1.1                           | -                                   | 4.1                           |
| Ge (substrate) | -                              | -                             | 15.9                                  | 12.1                          | 28.1                                | 18.9                          |
| Ge (oxide)     | -                              | -                             | 1.3                                   | 6.4                           | 1.4                                 | 10.4                          |
| S              | -                              | 1                             | -                                     | 4.2                           | -                                   | 7.2                           |

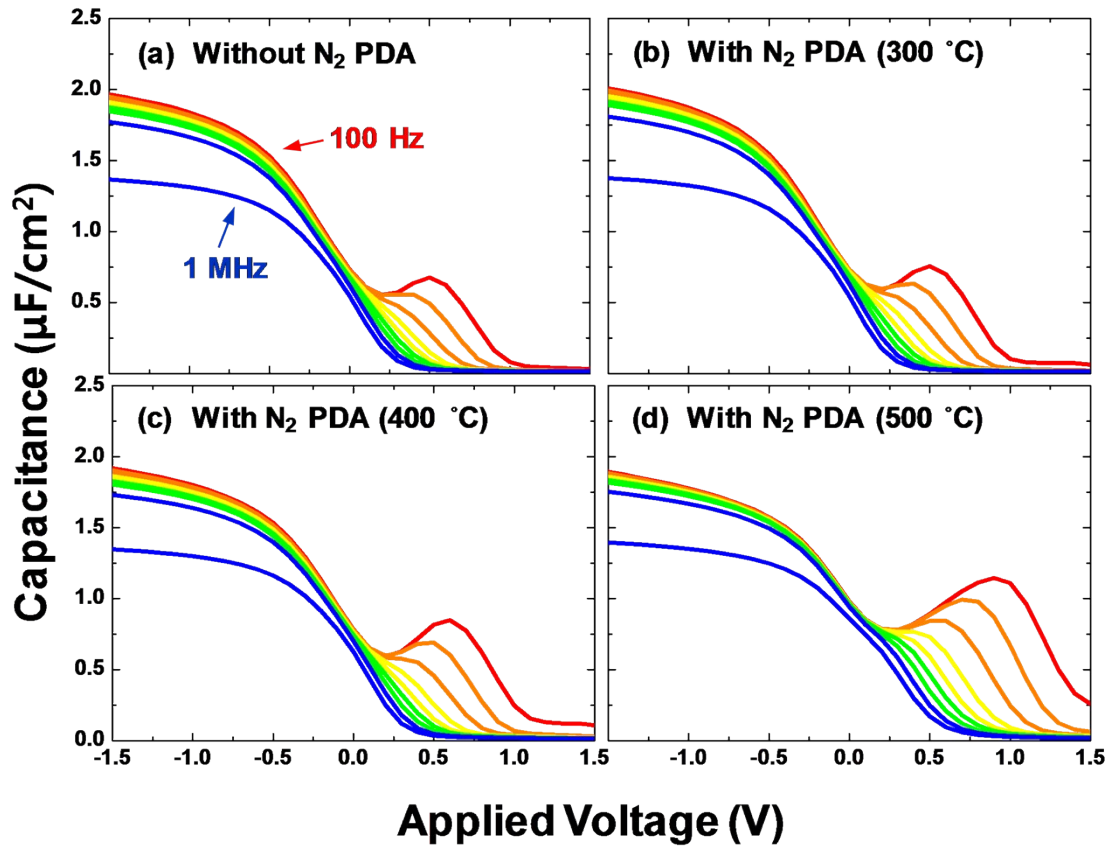

**Fig. S1.** Multi-frequency C–V responses measured from  $\text{HfO}_2$  ( $\sim 5$  nm, according to spectroscopic ellipsometry measurement) capacitors fabricated on  $\text{Si}_{0.7}\text{Ge}_{0.3}$  substrates (a) without and (b–d) with PDA. PDA was performed directly after  $\text{HfO}_2$  deposition for 30 s under  $\text{N}_2$  flow using RTA, and its temperature was varied: (b) 300, (c) 400, and (d) 500 °C. All fabricated capacitor samples underwent additional PMA at 300 °C for 30 min in forming gas environment (4 vol.%  $\text{H}_2$  balanced with  $\text{N}_2$ ).
